# Supplementary material for: PbS colloidal quantum dots as an effective hole transporter for planar heterojunction perovskite solar cells
Source: Royal Society of Chemistry journal article supplement (doi:10.1039/c4ta04272g), 2014-11-24
Supplement: c4ta04272g1.pdf [file c4ta04272g1.pdf]

## PbS Colloidal quantum dots as the effective hole transporter for planar heterojunction perovskite solar cells

Long Hu,<sup>a</sup> Weiwei Wang,<sup>b</sup> Huan Liu,<sup>c</sup> Jun Peng,<sup>b</sup> Hefeng Cao,<sup>c</sup>  
Gang Shao,<sup>c</sup> Zhe Xia,<sup>a</sup> Wanli Ma,<sup>\*b</sup> and Jiang Tang,<sup>\*a</sup>

<sup>a</sup> Wuhan National Laboratory for Optoelectronics, Huazhong University of Science and Technology, 1037 Luoyu Rd., Wuhan, Hubei 430074, China

<sup>b</sup> Institute of Functional Nano&Soft Materials (FUNSOM), Soochow University, Suzhou, Jiangsu 215123, China

<sup>c</sup> School of Optical and Electronic Information, Huazhong University of Science and Technology, 1037 Luoyu Road, Wuhan, Hubei 430074, China

**Synthesis of CH<sub>3</sub>NH<sub>3</sub>I:** Methylamine (33 wt % in methanol; Alfa) and hydroiodic acid (57 wt % in water; Alfa) were stirred at 0 °C for 2 h and then the solvent was evaporated using a rotary evaporator after the reaction. A white powder, methylammonium iodide, was obtained and recrystallized with ethanol and precipitated with diethyl ether. This process was repeated three times, and finally the products were dried at 60 °C in a vacuum for 24 h.

**Synthesis of PbS CQDs:** 0.45 g PbO (Alfa), 1.45 g Oleic acid (OA) (Alfa), 15 g octadecene (ODE) (Alfa) were added into 50 ml three-neck flask, and pumping at 90 °C for 12 h to prepare Pb precursor. 180 ul bis(trimethylsilyl) sulfide (TMS) (Sigma) was added into 10 ml ODE which was pumped in advance to remove H<sub>2</sub>O and O<sub>2</sub>. We synthesized four batch PbS CQDs by injected TMS into Pb precursor by adjusting the injection temperatures and reaction time.

Table 1.

| peak    | PbO    | TMS    | ODE  | OA     | Injected T | Reaction time |
|---------|--------|--------|------|--------|------------|---------------|
| 890 nm  | 0.45 g | 180 ul | 15 g | 1.45 g | 70 °C      | 120 s         |
| 1050 nm | 0.45 g | 180 ul | 15 g | 1.45 g | 120 °C     | 120 s         |
| 1150 nm | 0.45 g | 180 ul | 15 g | 1.45 g | 140 °C     | 60 s          |
| 1500 nm | 0.45 g | 180 ul | 15 g | 1.45 g | 180 °C     | 30 s          |

**Preparation of p-type PbS film:** 8 mg/ml PbS CQDs in hexane was spin-coated on patterned ITO glass for 20 s at 2500 rpm, and then the substrate was dipped into 10 mg/ml trimethylammonium hydroxide (TMAOH) methanol solution for 10 s to remove OA ligand capped on PbS CQDs. Then the film was rinsed with methanol. This process was repeated three times. As-prepared PbS CQDs film was annealed on 70 °C hotplate in air for 12 h.

Fig.1 TEM image of the 1-PbS CQDs

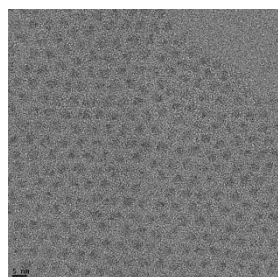

**Devices fabrication:** All device fabrication processes were carried out inside a nitrogen- filled glovebox with oxygen and moisture levels of <0.5 ppm. 300 mg/mL PbI<sub>2</sub> solution was prepared by

dissolved  $\text{PbI}_2$  in anhydrous  $\text{N,N}$ -dimethylformamide (DMF; Alfa) at  $60\text{ }^\circ\text{C}$  and stirred for 12 h. Then  $\text{PbI}_2$  solution was spin-coated on PbS CQDs film for 30 s at 3000 rpm, and heated on  $70\text{ }^\circ\text{C}$  hotplate for 30 min to remove DMF. When the film cooled to room temperature, the  $\text{PbI}_2$  film was dipped into 10 mg/ml  $\text{CH}_3\text{NH}_3\text{I}$  isopropanol (IPA) solution for 45 s at  $50\text{ }^\circ\text{C}$ , then rinsed with anhydrous IPA for 10 s. 20 mg/ml PCBM( [6,6]-phenyl-C61-butyric acid methyl ester) in chloroform was spin-coated onto  $\text{CH}_3\text{NH}_3\text{PbI}_3$  film for 30 s at 3000 rpm. The top 100 nm Al electrode was prepared by thermal evaporated.

**Measurement and Characterization.** UV-VIS-NIR spectra were recorded on a Perkin Elmer model Lambda 750. Measurement of the current density –voltage characteristics of the devices was carried out using a Keithley 2400 ( I– V ) digital source meter under a simulated A M 1.5 G solar irradiation at  $100\text{ mW/cm}^2$  (Newport, AAA solar simulator, 94 023A-U) inside the glovebox. Device area is  $7.25\text{ mm}^2$ . Tapping mode atomic force microscopy (AFM) was performed using a Veeco multimode V instrument. Scanning electron microscopy (SEM) images were obtained using a FEI Nova NanoSEM 450. X-ray diffraction (XRD) results were acquired using a Phillips X' Pert PRO. Photoluminescence spectra were obtained by using an automated spectrofluorometer (FluoMax, Horiba Jobin-Yvon). The external quantum efficiency was measured using power source(300W xenon lamp of Newport, Oriel 69911) with a Monochromator(Oriel, model 74004).

Table 2

Control device performance: using different size of PbS CQDs but all without perovskite absorbers

| sample | $V_{oc}(V)$ | $J_{sc}(\text{mA/cm}^2)$ | FF   | PCE(%) |
|--------|-------------|--------------------------|------|--------|
| 1-PbS  | 0.37        | 2.24                     | 0.38 | 0.31   |
| 2-PbS  | 0.34        | 2.78                     | 0.39 | 0.35   |
| 3-PbS  | 0.33        | 2.83                     | 0.37 | 0.34   |
| 4-PbS  | 0.27        | 2.54                     | 0.35 | 0.24   |
